# Supplementary material
Source: HighWire-hosted journal article supplement (https://jitc.bmj.com/content/8/2/e000772)

## Supplementary Figure 9

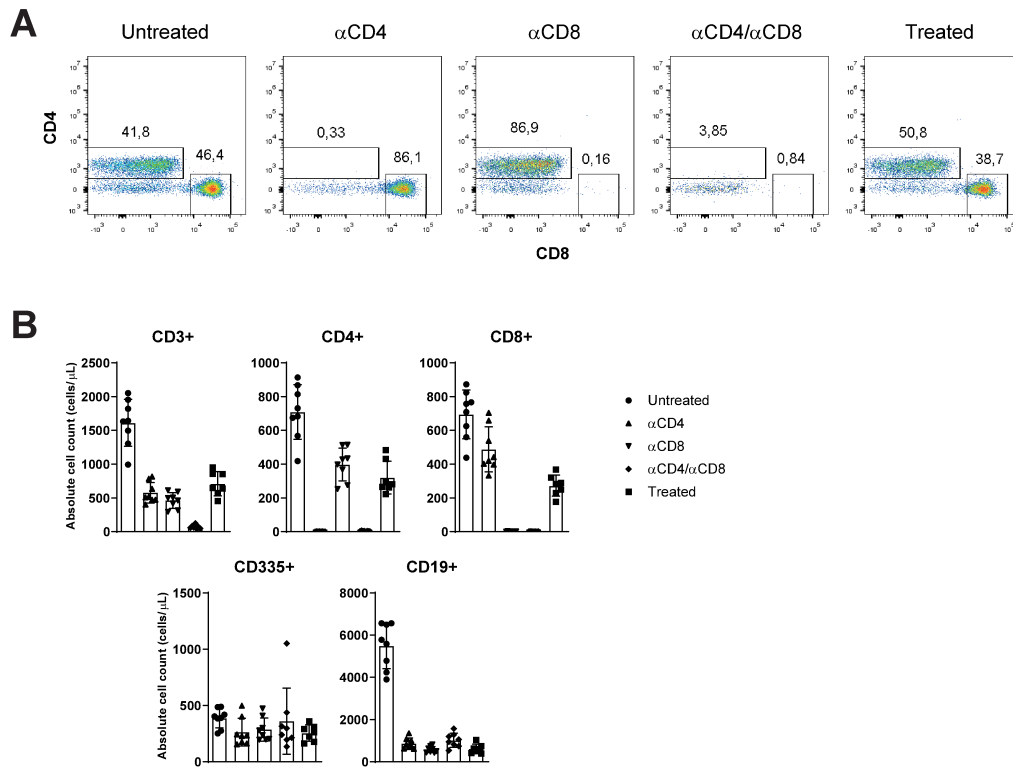

Supplement: inline-supplementary-material-11 [file inline-supplementary-material-11.pdf]

# Supplementary Figure 17

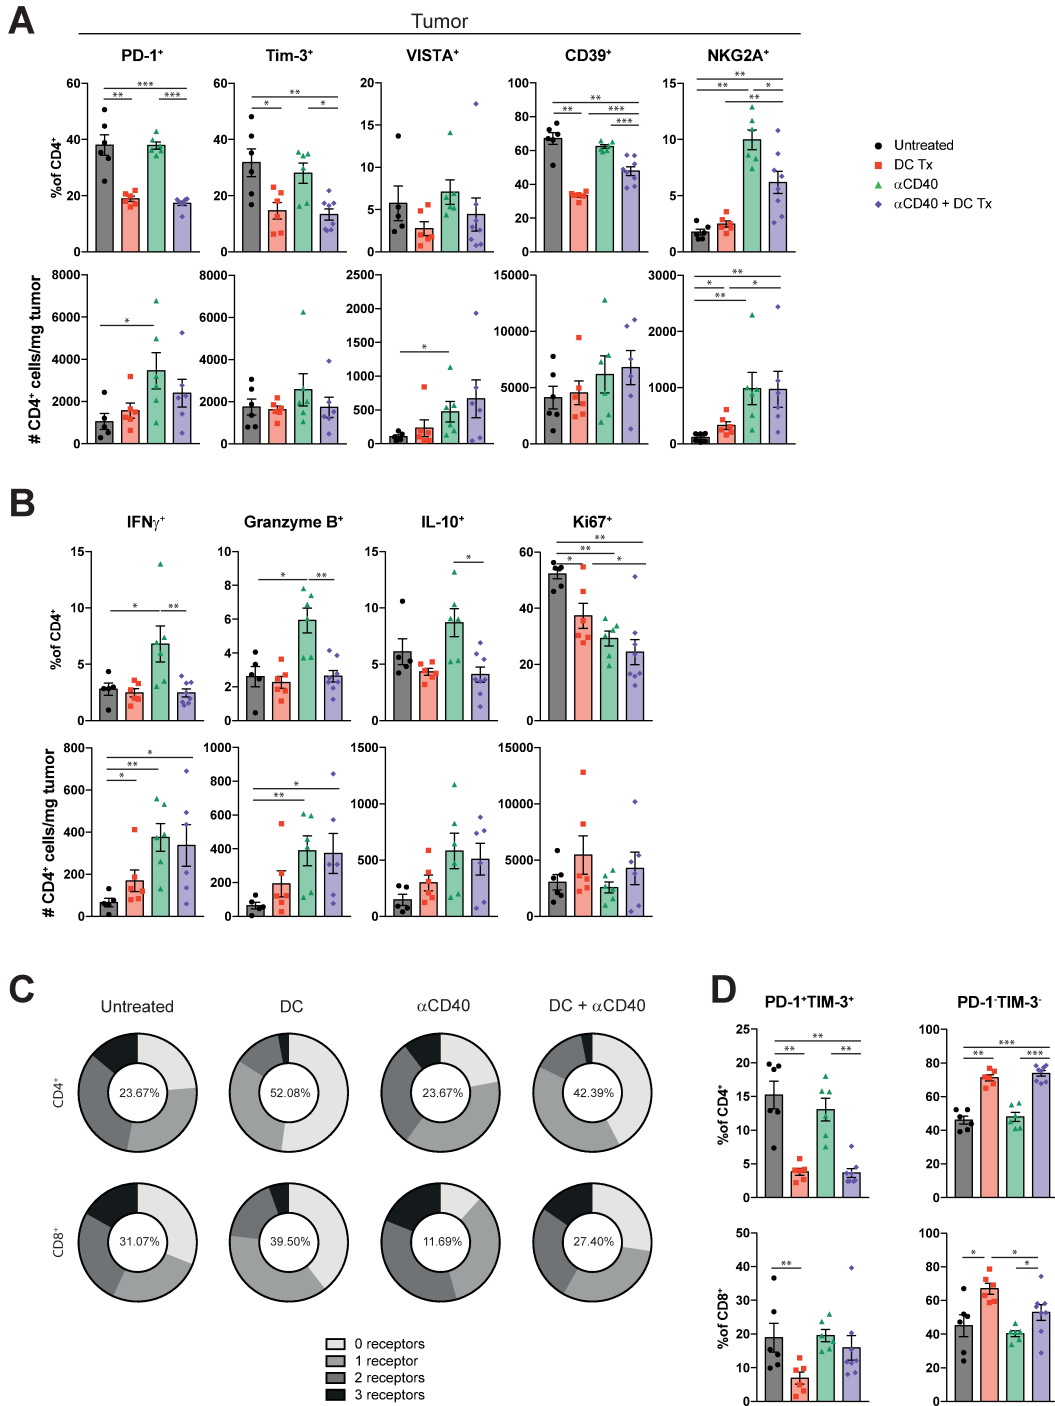

Supplement: inline-supplementary-material-19 [file inline-supplementary-material-19.pdf]

## Supplementary Figure 18

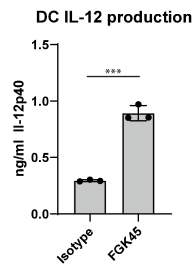

Supplement: inline-supplementary-material-20 [file inline-supplementary-material-20.pdf]

## Supplementary Figure 1

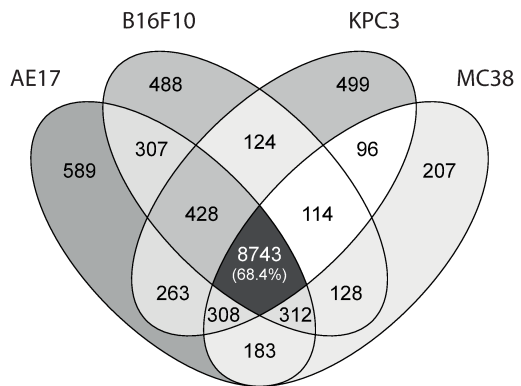

Supplement: inline-supplementary-material-3 [file inline-supplementary-material-3.pdf]

## Supplementary Figure 5

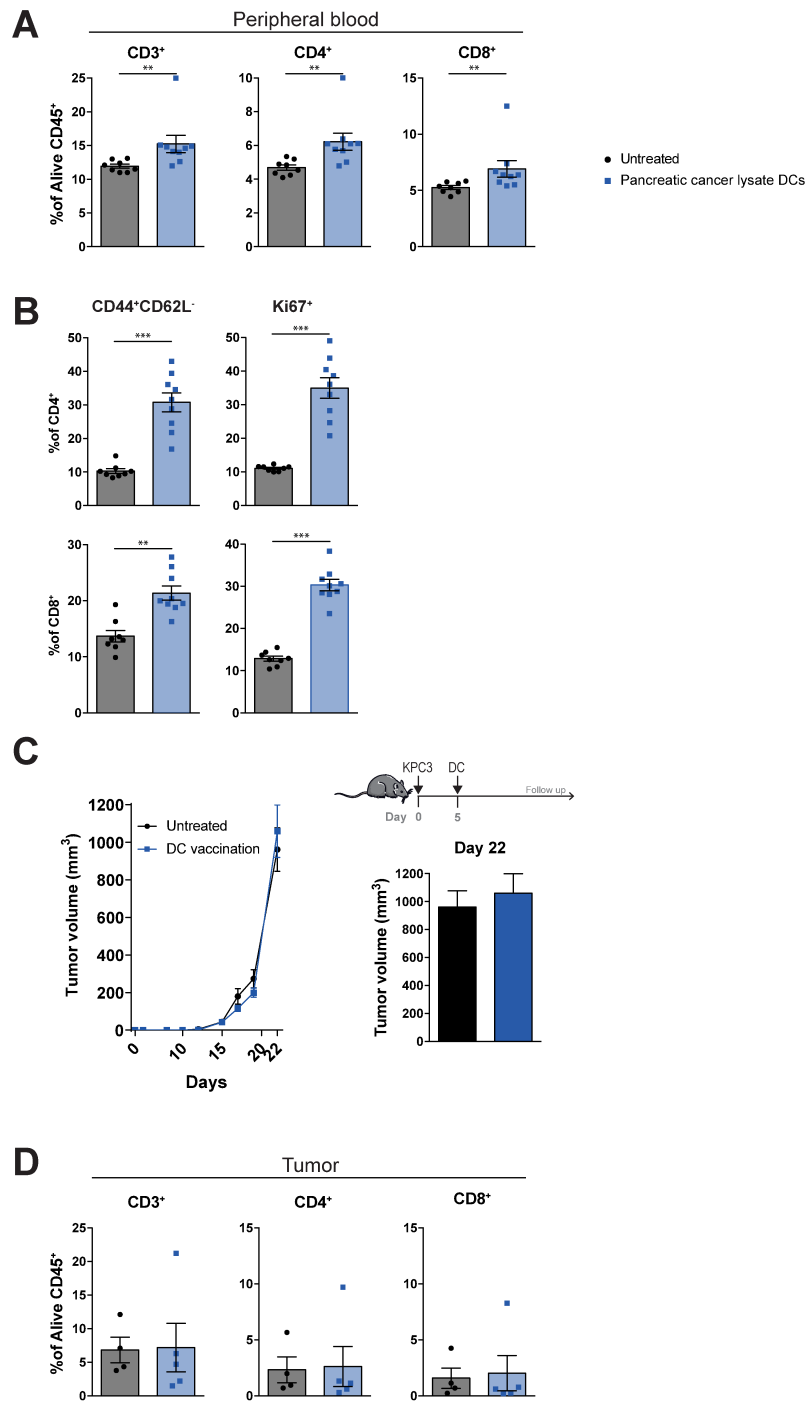

Supplement: inline-supplementary-material-7 [file inline-supplementary-material-7.pdf]

## Supplementary Figure 6

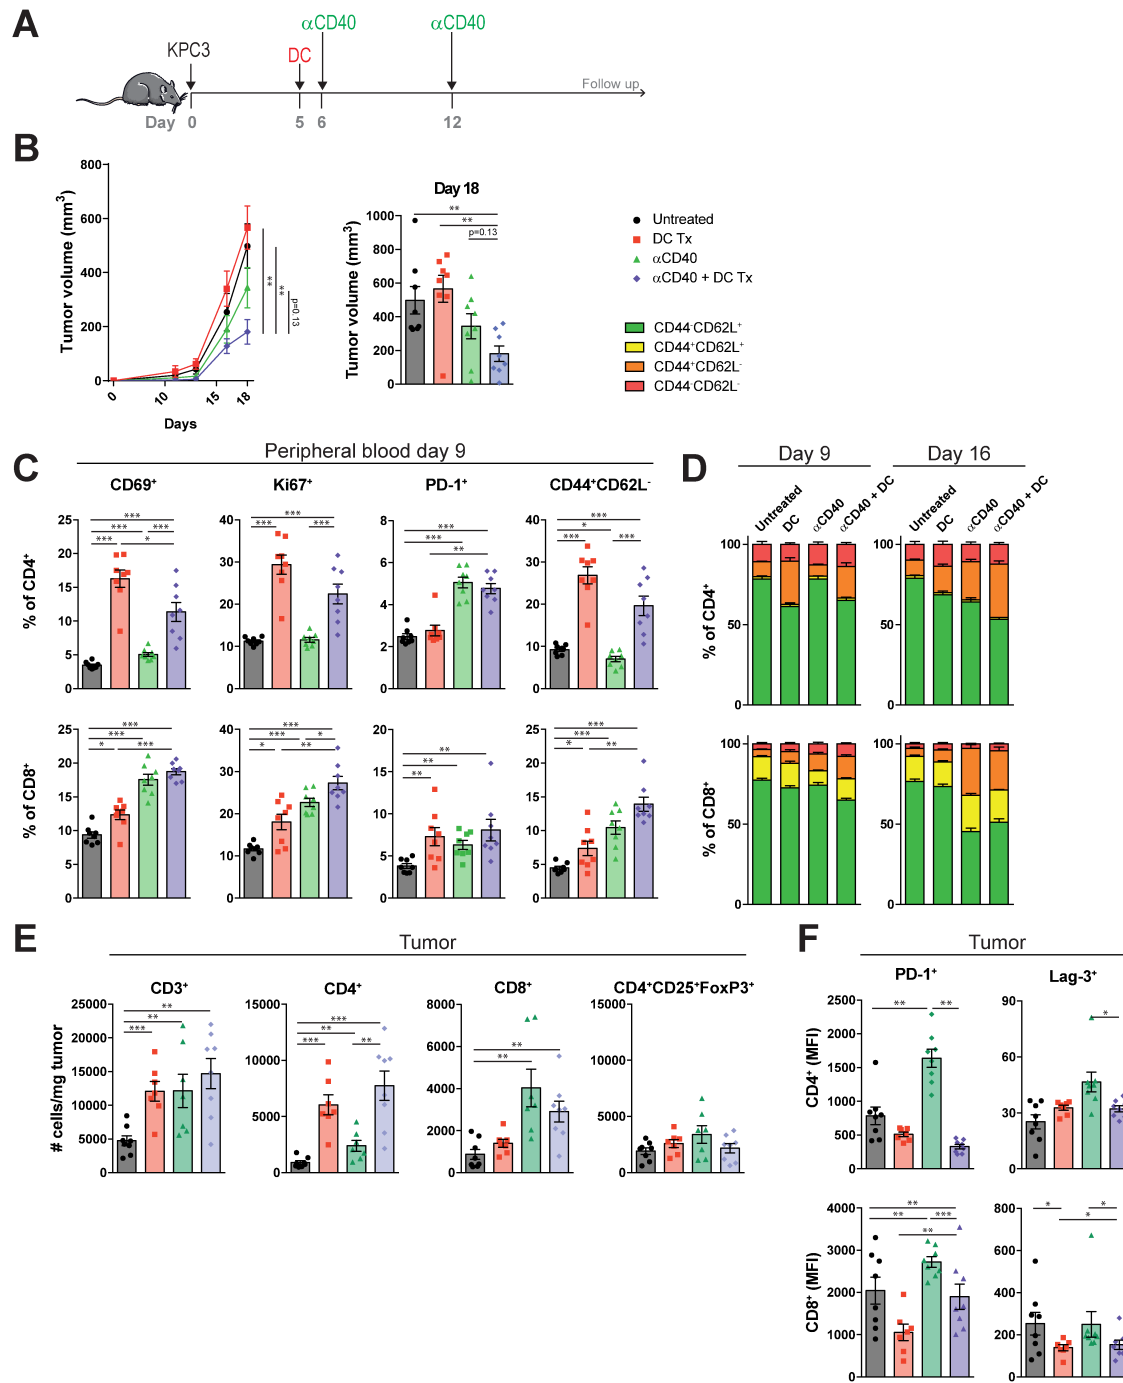

Supplement: inline-supplementary-material-8 [file inline-supplementary-material-8.pdf]

## Supplementary Figure 7

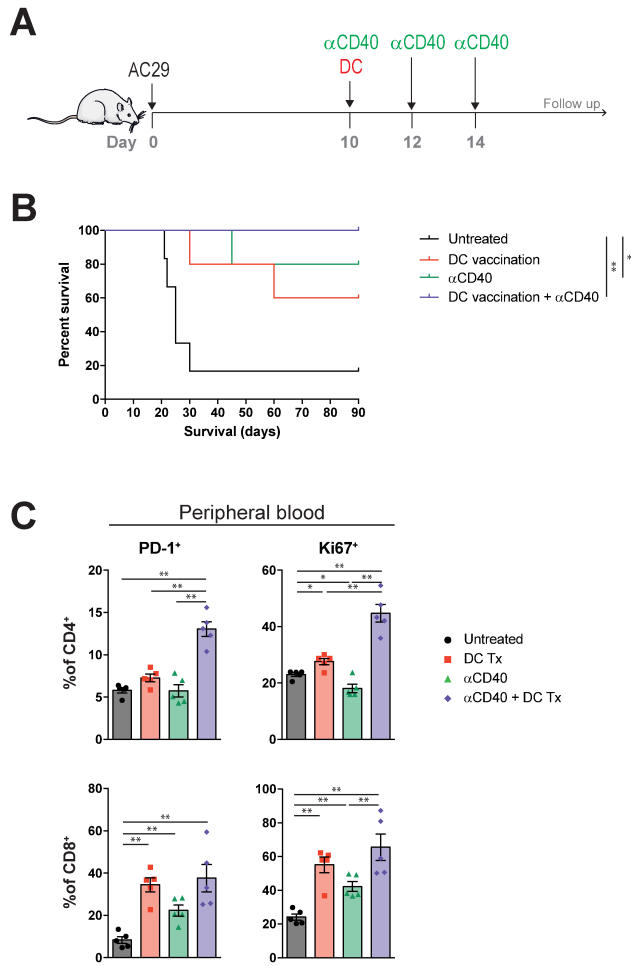

Supplement: inline-supplementary-material-9 [file inline-supplementary-material-9.pdf]
